# Supplementary material
Source: MDPI journal article supplement (https://www.mdpi.com/2673-7655/2/1/5)
Supplement: s1 [file s1]

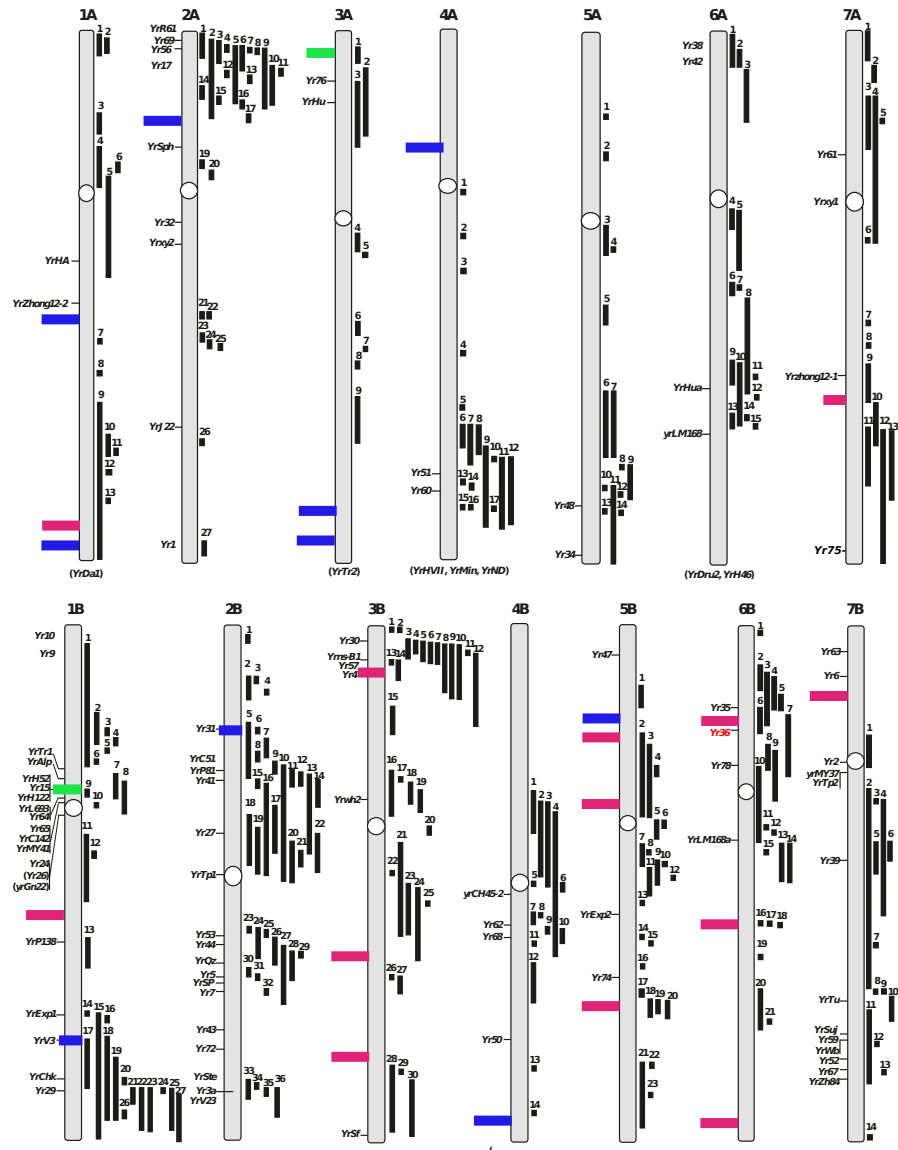

**Fig S9 Chromosomal locations of wheat genes or quantitative trait loci (QTL) for resistance to stripe rust. Resistance genes with permanent and provisional Yr symbols are shown on the left and QTL on the right of each chromosome. QTL are coded by numbers and can be referred to Table 5.4 in Wang & Chen (2017). Loci detected in the current study are indicated by colored boxes: red - APR; green - ASR UIT (unified IT); blue- ASR race specific loci. Figure is based on Fig 5.1 from Wang & Chen (2017)[5].**
