# Supplementary material
Source: MDPI journal article supplement (https://www.mdpi.com/2673-7655/2/1/5)

**SUPER.PST14**

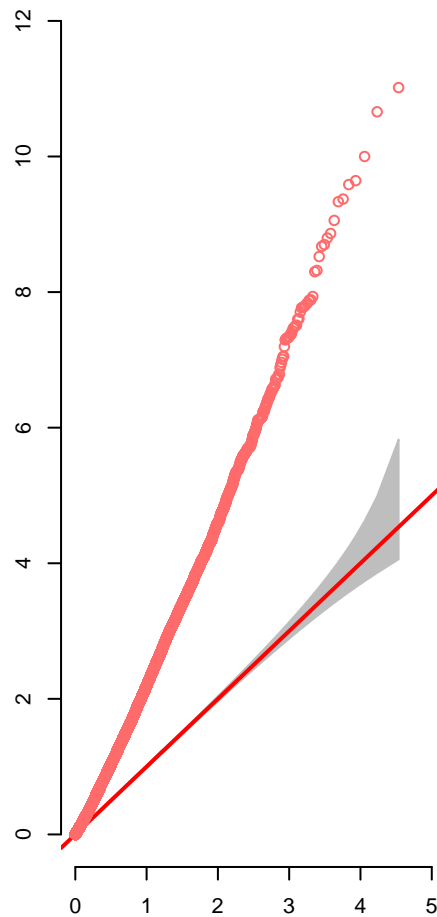

**SUPER.PST5006**

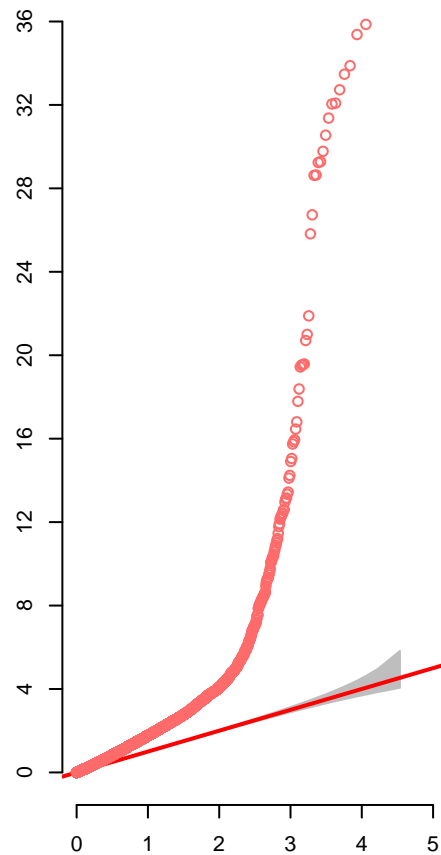

**SUPER.PST40**

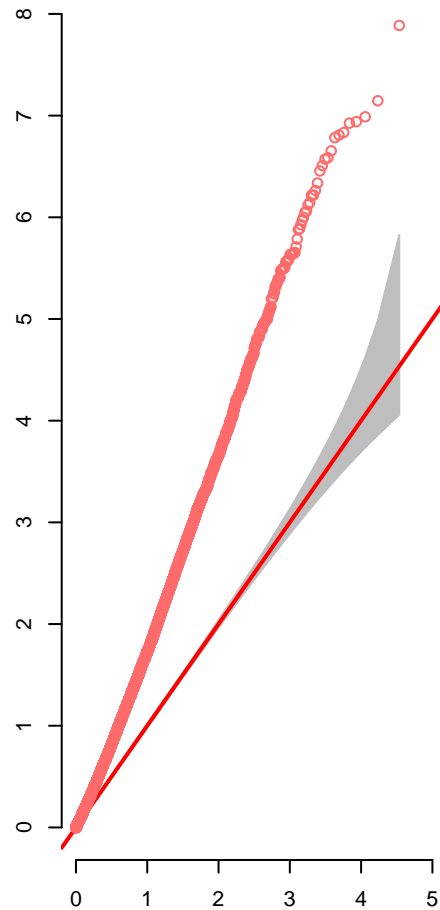

**SUPER.PST37**

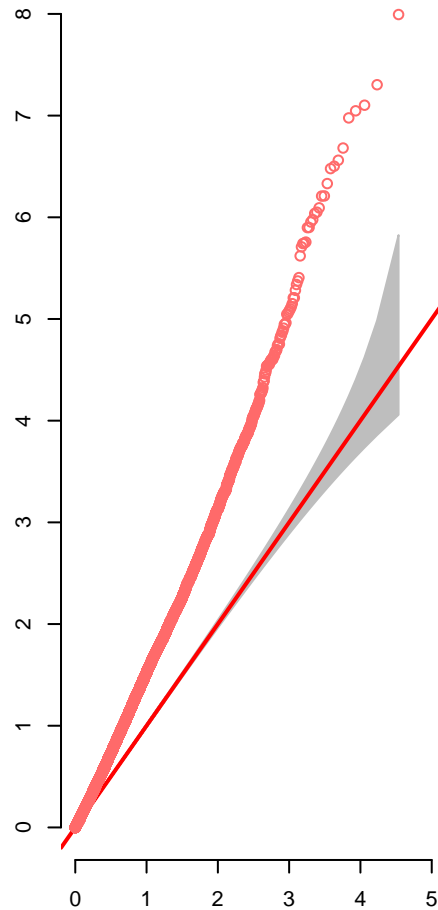

Supplement: s1 [file s1]

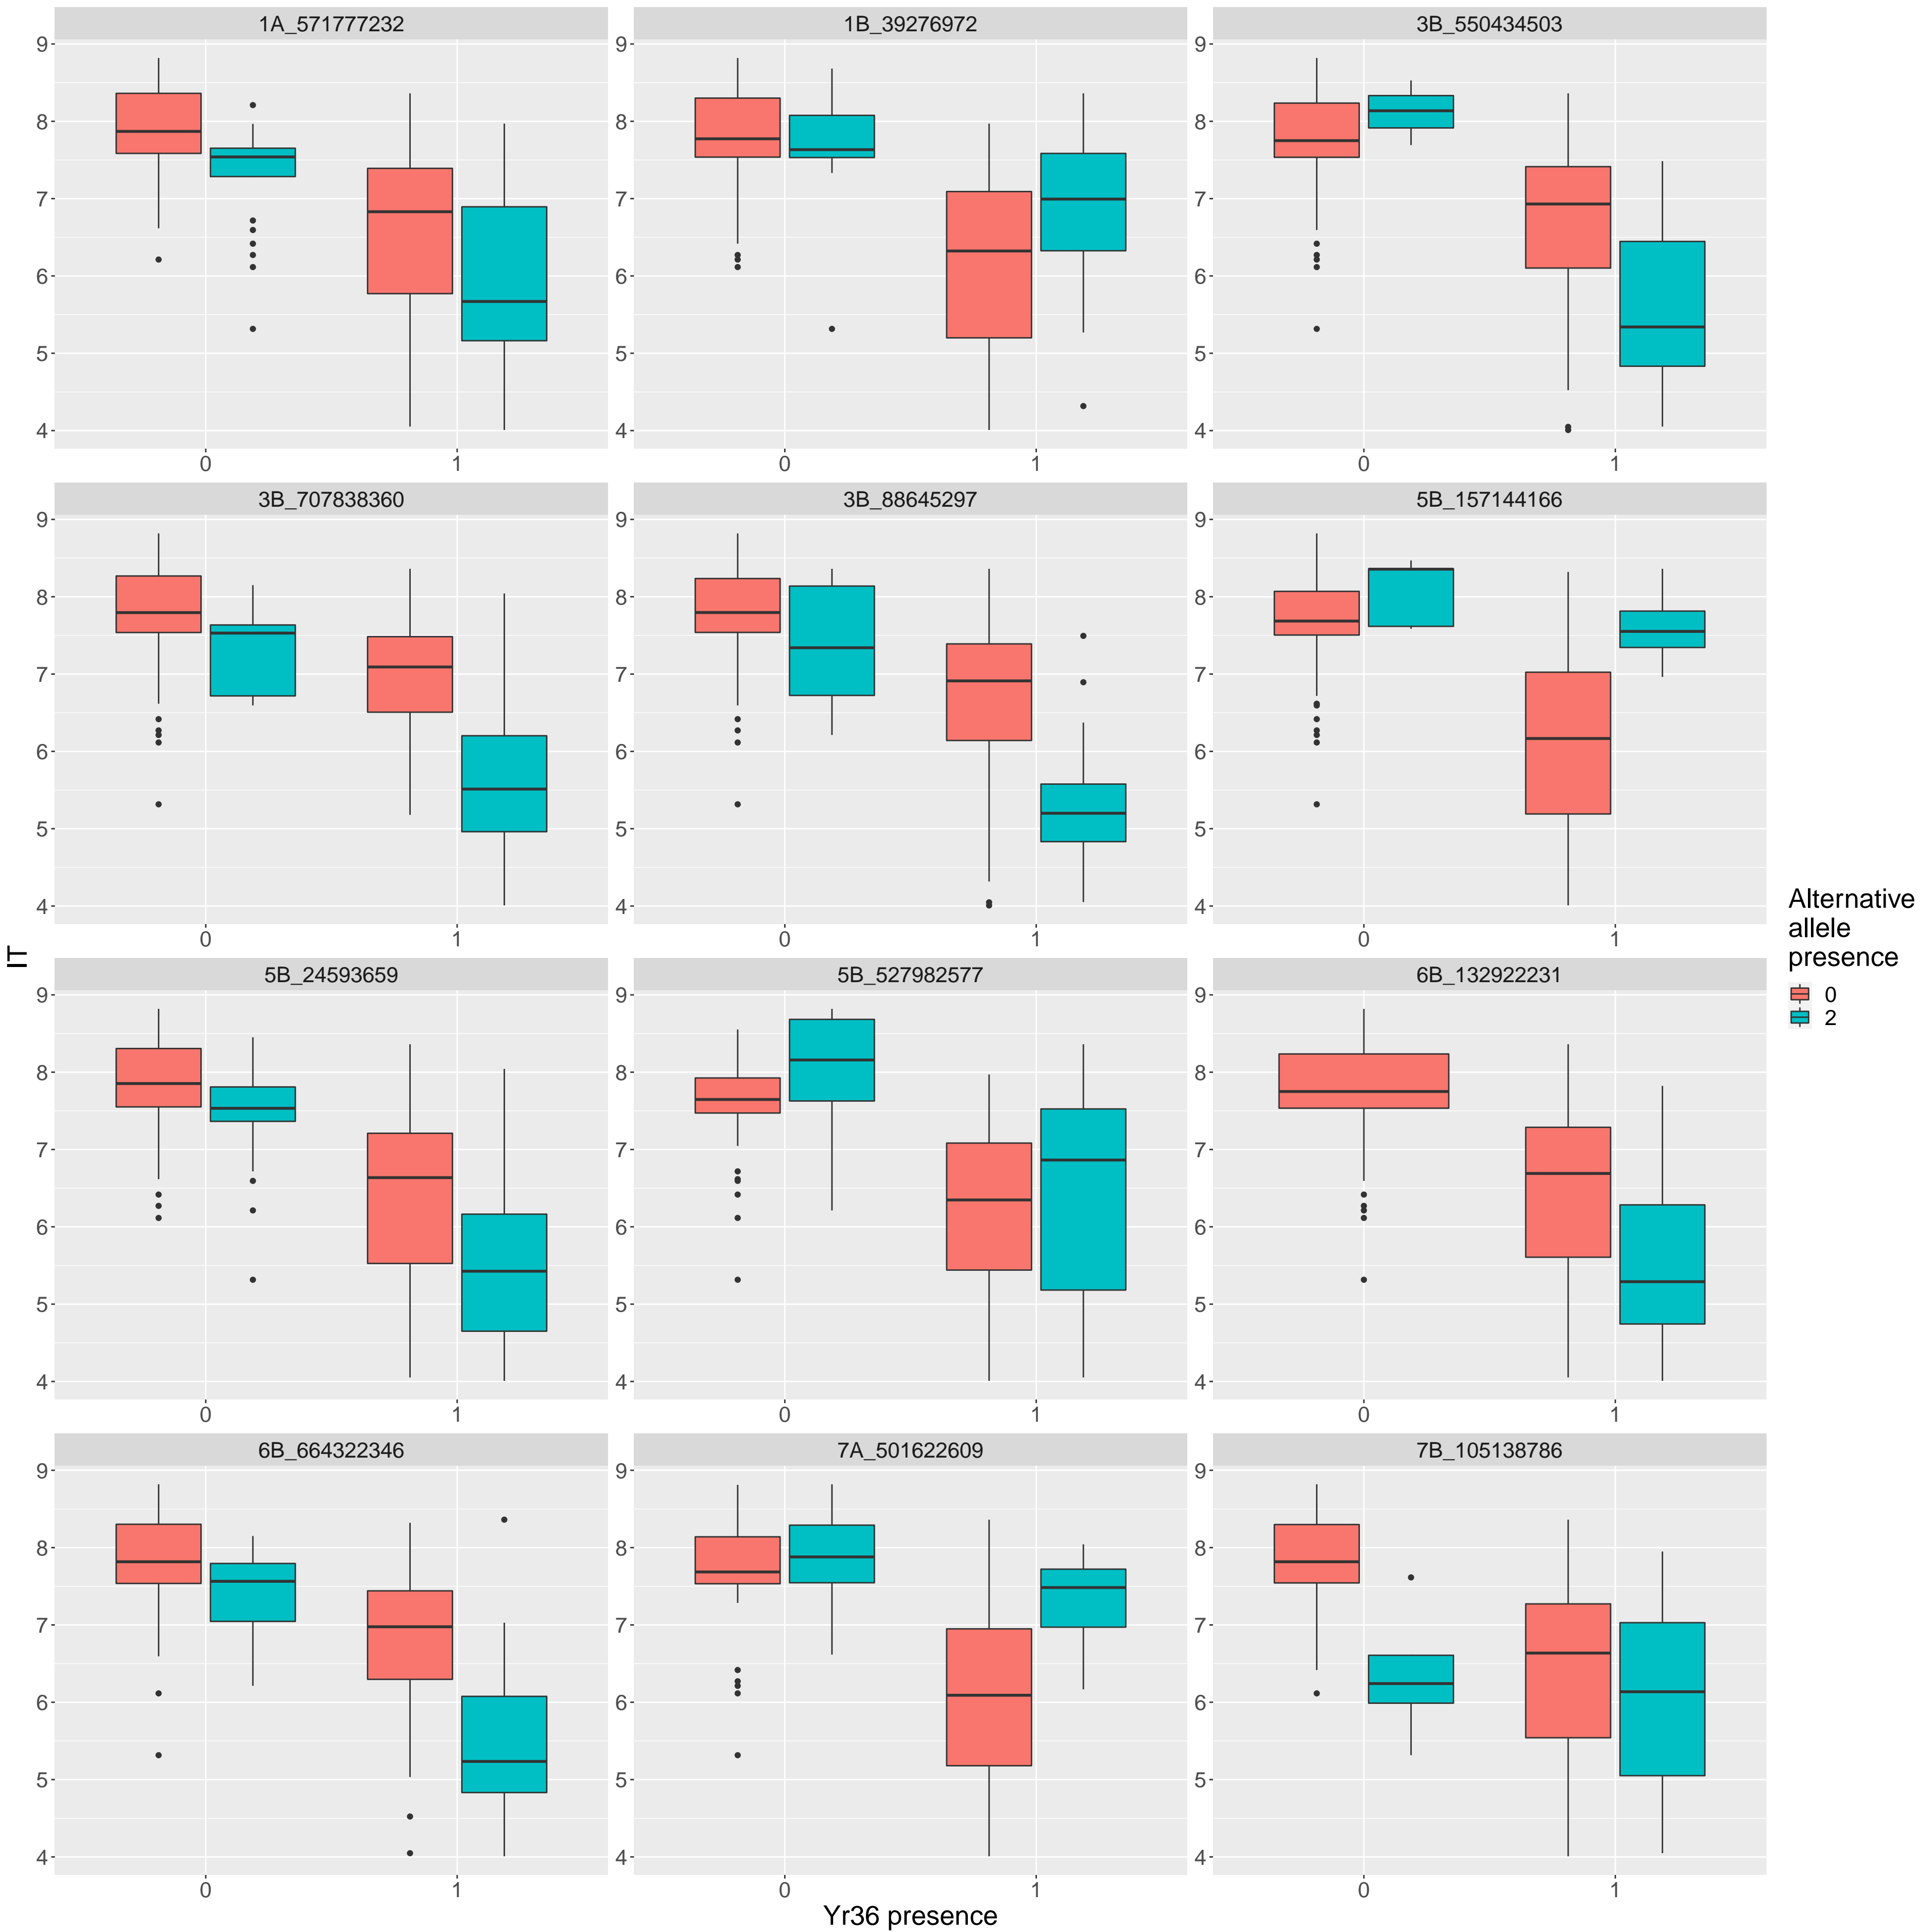

Supplement: s1 [file s1]

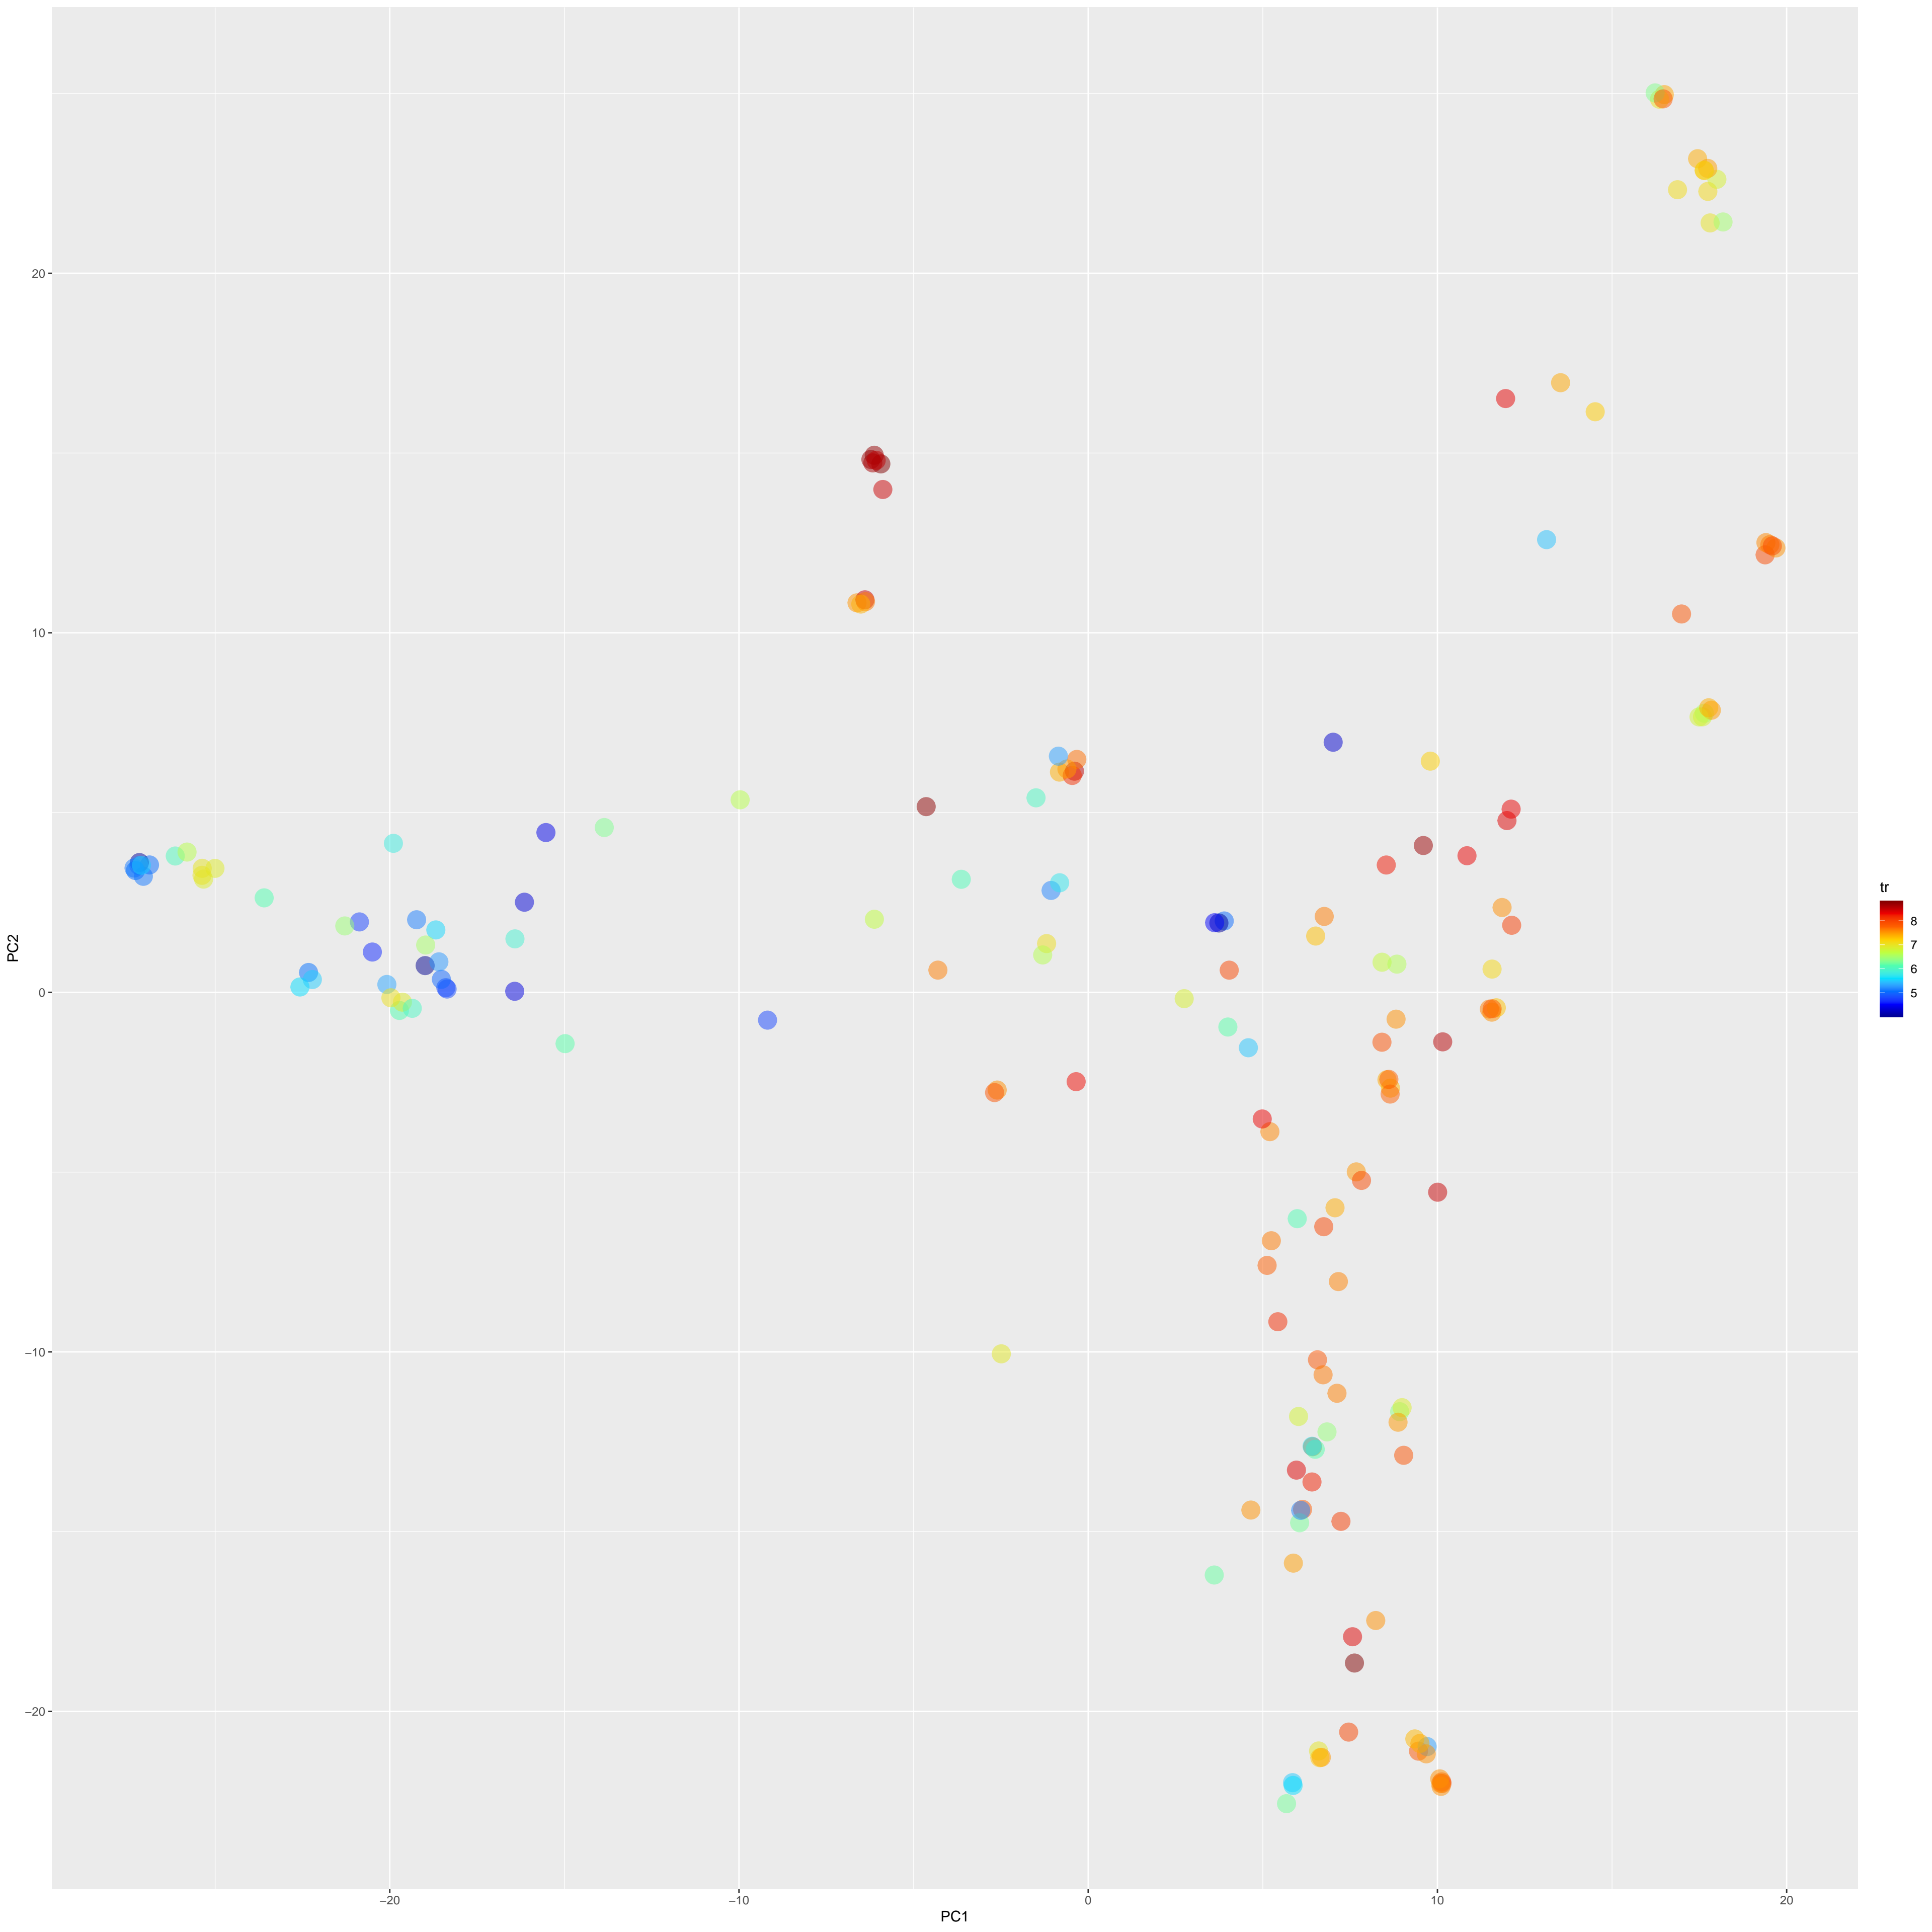

Supplement: s1 [file s1]

Pairwise LD

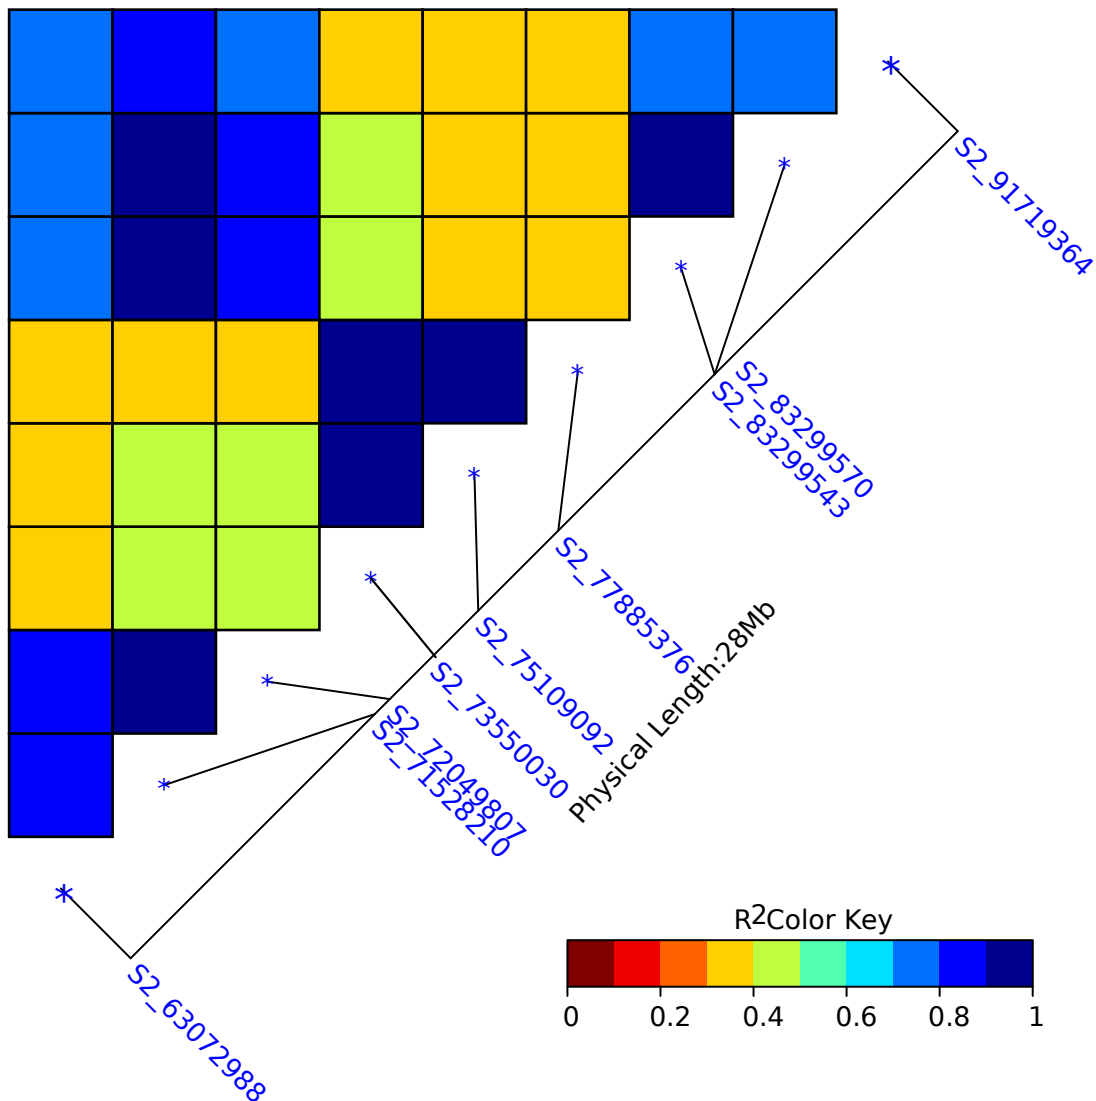

Supplement: s1 [file s1]

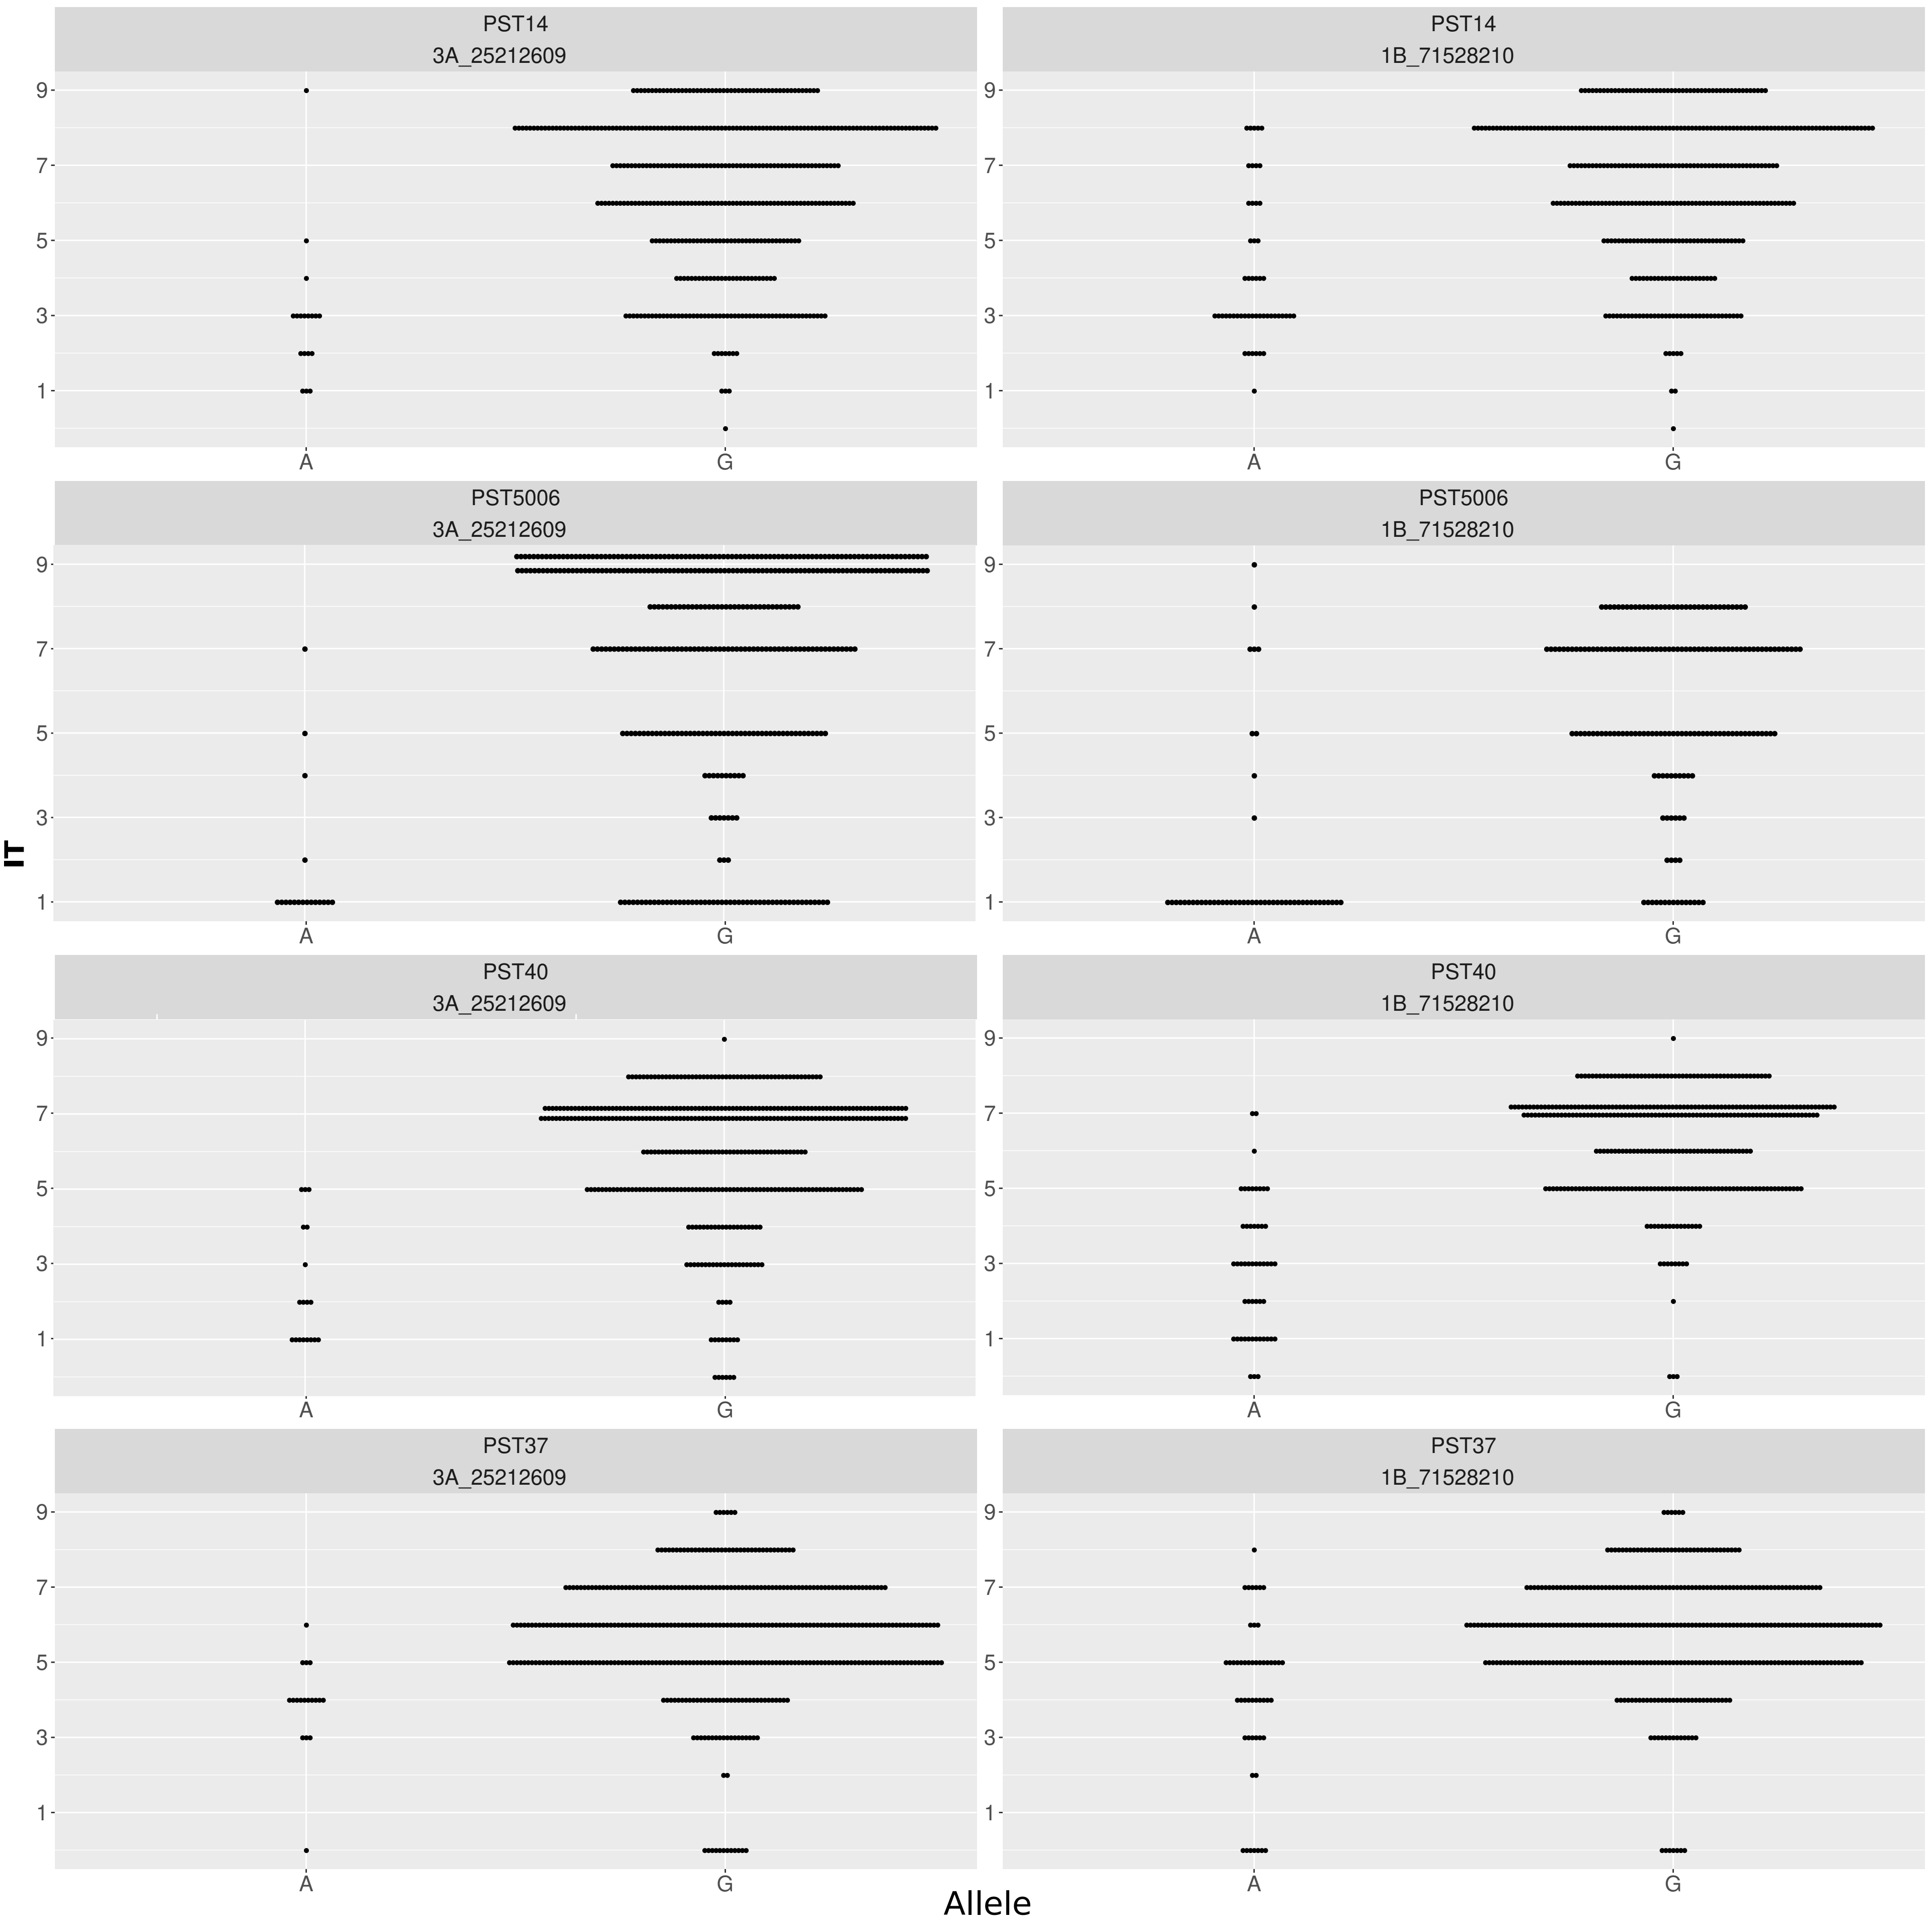

Supplement: s1 [file s1]
